# Supplementary material
Source: publisher figshare collection journal article supplement (https://tandf.figshare.com/ndownloader/files/40908570)
Supplement: Supplementary file 1 [file 40908570]

## Sheet: Annotations
Gene		Arabidopsis	Strand	Start	End	Length	Anticodon
*****		LSC		1	84170	84170
		tRNA-His	-	3	77	75	GTG	Old	-	4	76		6789/6836
1		psbA	-	383	1444	1062
1	Two exons	tRNA-Lys	-	1717	1751	35	UUU GT/AT
			-	4311	4347	37	GT/AT
2		matK	-	2056	3570	1515
3	Two exons	rps16	-	5084	5283	200	GT/AC
			-	6149	6188	40
2		tRNA-Gln	-	6616	6687	72	UUG
4		psbK	+	7017	7202	186
5		psbI	+	7583	7693	111
3		tRNA-Ser	-	7785	7874	90	GCU	Old	+	7785	7872	88	2508/2525
4	Two exons	tRNA-Gly	+	8646	8668	23	UCC GT/AC	Old	-	8646	8668	23
			+	9384	9431	48			-	9383	9431	49
5		tRNA-Arg	+	9590	9661	72	UCU
6		atpA	-	9938	11461	1524
7	Two exons	atpF	-	11529	11938	410	GT/AT
			-	12654	12798	145
8		atpH	-	13262	13507	246
9		atpI	-	14021	14770	750
10		rps2	-	15013	15723	711
11		rpoC2	-	15938	20068	4131
12	Two exons	rpoC1	-	20251	21861	1611	GT/AT
			-	22653	23084	432
13		rpoB	-	23111	26329	3219
6		tRNA-Cys	+	27373	27443	71	GCA
14		petN	+	28089	28178	90
15		psbM	-	28707	28811	105
7		tRNA-Asp	-	29801	29874	74	GUC
8		tRNA-Tyr	-	30323	30406	84	GUA	23499/23636
9		tRNA-Glu	-	30466	30538	73	UCA
10		tRNA-Thr	+	31369	31440	72	GGU
16		psbD	+	32711	33772	1062
17		psbC	+	33720	35141	1422
11		tRNA-Ser	-	35312	35403	92	UGC	5391/5431
18		psbZ	+	35751	35939	189
12		tRNA-Gly	+	36490	36560	71	GCC
13		tRNA-fMet	-	36705	36776	72	CAU	Old	-	36704	36777	74	CAU
19		rps14	-	36938	37240	303
20		psaB	-	37375	39579	2205
21		psaA	-	39605	41857	2253
22	Three exons	ycf3	-	42584	42736	153	GT/AC	Old	-	42584	42736	153
			-	43524	43753	230			-	43524	43751	228
			-	44468	44591	124			-	44466	44591	126
14		tRNA-Ser	+	44827	44913	87	GGA	1099/1111
23		rps4	-	45223	45828	606
15		tRNA-Thr	-	46213	46285	73	UGU
16	Two exons	tRNA-Leu	+	46894	46930	37	UAA TT/AA	tRNA-Leu	+	46894	46928	35
			+	47443	47490	48			+	47441	47490	50
17		tRNA-Phe	+	48175	48247	73	GAA
24		ndhJ	-	48677	49153	477
25		ndhK	-	49257	49934	678
26		ndhC	-	50001	50363	363
18	Two exons	tRNA-Val	-	51199	51233	35	UAC GT/AC
			-	51833	51871	39	GT/AC
19		tRNA-Met	+	52056	52128	73	CAU
27		atpE	-	52265	52663	399
28		atpB	-	52660	54156	1497
29		rbcL	+	54958	56397	1440
30		accD	+	57075	58541	1467
31		psaI	+	59247	59360	114
32		ycf4	+	59772	60326	555
33		cemA	+	60741	61430	690
34		petA	+	61657	62619	963
35		psbJ	-	63538	63660	123
36		psbL	-	63804	63920	117
37		psbF	-	63942	64061	120
38		psbE	-	64071	64322	252
39		petL	+	65712	65807	96
40		petG	+	65998	66111	114
20		tRNA-Trp	-	66229	66302	74	CCA
21		tRNA-Pro	-	66490	66563	74	UGG
41		psaJ	+	66929	67063	135
42		rpl33	+	67488	67688	201
43		rps18	+	67917	68222	306
44		rpl20	-	68512	68865	354
45	Three exons	rps12	-	69611	69724	114	GT/AC GT/CC
			-	97999	98024	26
				98562	98793	232
			+	139856	140087	232
				140623	140688	66
46	Three exons	clpP	-	69910	70137	228	GT/AT TG/TC
			-	70653	70944	292
			-	71812	71882	71
47		psbB	+	72371	73897	1527
48		psbT	+	74082	74183	102
49		psbN	-	74249	74380	132
50		psbH	+	74485	74706	222
51	Two exons	petB	+	74841	74846	6	GT/AT
			+	75651	76292	642
52	Two exons	petD	+	76481	76488	8	GT/AT
			+	77198	77672	475
53		rpoA	-	77901	78890	990
54		rps11	-	78960	79376	417
55		rpl36	-	79489	79602	114
56		rps8	-	80068	80472	405
57		rpl14	-	80696	81064	369
58	Two exons	rpl16	-	81189	81587	399	GT/AC
			-	82644	82652	9
59		rps3	-	82826	83482	657
60		rpl22	-	83467	83949	483
*****		IR1		84171	110438	26268
61		rps19	-	84005	84283	279
22		tRNA-His	+	Lost			GUG
62	Two exons	rpl2	-	84337	84770	434	GT/AA	Old	-	84337	84771	435
			-	85453	85843	391			-	85454	85843	390
63		rpl23	-	85862	86143	282
23		tRNA-Ile	-	86312	86385	74	CAU
64		ycf2	+	86474	93358	6885
24		tRNA-Leu	-	94276	94356	81	CAA
65	Two exons	ndhB	-	94941	95702	762	GT/AC
			-	96388	97164	777
66		rps7	-	97478	97945	468
25		tRNA-Val	+	100709	100780	72	GAC
		16S rRNA	+	101012	102502	1491
26	Two exons	tRNA-Ile	+	102801	102837	37	GAU TT/AC	16923/17040
			+	103567	103601	35
27	Two exons	tRNA-Ala	+	103665	103702	38	UGC TT/GT
			+	104504	104538	35
		23S rRNA	+	104691	107500	2810
		4.5S rRNA	+	107599	107701	103
		5S rRNA	+	107949	108069	121
28		tRNA-Arg	+	108302	108375	74	ACG
29		tRNA-Asn	-	109013	109084	72	GUU
67		ycf1	+	109405	110436	1032
		rps15	+	Lost
*****		SSC		110439	128120	17682
68		ndhF	-	110398	112638	2241
69		rpl32	+	113449	113607	159
30		tRNA-Leu	+	114270	114349	80	UAG
70		ccsA	+	114461	115447	987
71		ndhD	-	115665	117167	1503
72		psaC	-	117318	117563	246
73		ndhE	-	117804	118109	306
74		ndhG	-	118377	118907	531
75		ndhI	-	119244	119762	519
76	Two exons	ndhA	-	119847	120376	530	GT/AT
76			-	121457	122009	553
77		ndhH	-	122011	123192	1182
*****		IR2		128121	154478	26358
78		rps15	-	123296	123562	267
		ycf1	-	123884	129244	5361
		tRNA-Asn	+	129565	129636	72	GUU
		tRNA-Arg	-	130274	130347	74	ACG
		5S rRNA	-	130580	130700	121
		4.5S rRNA	-	130948	131050	103
		23S rRNA	-	131149	133958	2810
	Two exons	tRNA-Ala	-	134111	134145	35	UGC
			-	134947	134984	38
	Two exons	tRNA-Ile	-	135048	135082	35	GAU
			-	135812	135848	37
		16S rRNA	-	136147	137637	1491
		tRNA-Val	-	137869	137940	72	GAC
		rps7	+	140704	141171	468
	Two exons	ndhB	+	141485	142261	777	GT/AC
			+	142947	143708	762
		tRNA-Leu	+	144293	144373	81	CAA
		ycf2	-	145291	152175	6885
		tRNA-Ile	+	152264	152337	74	CAU
		rpl23	+	152506	152787	282
	Two exons	rpl2	+	152806	153195	390	GT/AA
			+	153878	154312	435
Note
The highlights (in yellow color) indicat the corrected annotations of genes in NC_000932
Reference	Position	Type	Before	After editing	Region
NC_000932.1	2931	GA	TGA	TAA	matK(-)
NC_000932.1	12707	GA	TGG	TAG	atpF(-)
NC_000932.1	23898	GA	TGA	TAA	rpoB(-)
NC_000932.1	25779	GA	TGA	TAA	rpoB(-)
NC_000932.1	25992	GA	AGA	AAA	rpoB(-)
NC_000932.1	32369	GA	AAAAAAGAAAAAAAAAA	AAAAAAAAAAAAAAAAA	intergenic
NC_000932.1	35800	CT	TCA	TTA	psbZ
NC_000932.1	37161	GA	TGA	TAA	rps14(-)
NC_000932.1	58642	CT	TCA	TTA	intergenic
NC_000932.1	63985	GA	AAAAAAGAAA	AAAAAAAAAA	psbF(-)
NC_000932.1	64109	GA	AAAGGATCAAAA	AAAGAATCAAAA	psbE(-)
NC_000932.1	69553	GA	TGA	TAA	intergenic
NC_000932.1	69942	GA	TGA	TAA	rps12(-)
NC_000932.1	78109	CT	TTCTTTTGTTTTTTTTTTTTTTCTT	TTCTTTTGTTTTTTTTTTTTTTTTT	rpoA(-)
NC_000932.1	78691	GA	AGA	AAA	rpoA(-)
NC_000932.1	86055	GA	TGA	TAA	rpl23(-)
NC_000932.1	87768	CT	TCG	TTG	ycf2
NC_000932.1	94999	GA	TGG	TAG	ndhB(-)
NC_000932.1	95225	GA	TGG	TAG	ndhB(-)
NC_000932.1	95608	GA	TGA	TAA	ndhB(-)
NC_000932.1	95644	GA	TGA	TAA	ndhB(-)
NC_000932.1	95650	GA	TGA	TAA	ndhB(-)
NC_000932.1	96259	GA	TGA	TAA	intron
NC_000932.1	96419	GA	AGA	AAA	ndhB(-)
NC_000932.1	96579	GA	TGA	TAA	ndhB(-)
NC_000932.1	96698	GA	TGG	TAG	ndhB(-)
NC_000932.1	97016	GA	TGA	TAA	ndhB(-)
NC_000932.1	112349	GA	TGA	TAA	ndhF(-)
NC_000932.1	116281	GA	GGG	GAG	ndhD(-)
NC_000932.1	116290	GA	TGA	TAA	ndhD(-)
NC_000932.1	116494	GA	TGA	TAA	ndhD(-)
NC_000932.1	116785	GA	TGA	TAA	ndhD(-)
NC_000932.1	117166	GA	CGT	CAT	ndhD(-)*
NC_000932.1	118858	GA	GGA	GAA	ndhG(-)
NC_000932.1	141633	CT	TCA	TTA	ndhB
NC_000932.1	141951	CT	CCA	CTA	ndhB
NC_000932.1	142070	CT	TCA	TTA	ndhB
NC_000932.1	142230	CT	TCT	TTT	ndhB
NC_000932.1	142390	CT	TCA	TTA	intron
NC_000932.1	142999	CT	TCA	TTA	ndhB
NC_000932.1	143005	CT	TCA	TTA	ndhB
NC_000932.1	143041	CT	TCA	TTA	ndhB
NC_000932.1	143424	CT	CCA	CTA	ndhB
NC_000932.1	143650	CT	CCA	CTA	ndhB
NC_000932.1	150881	GA	CGA	CAA	ycf2(-)
NC_000932.1	152594	CT	TCA	TTA	rpl23
Note: a total of 46 editing sites were annotated in the present study. The new identified editing sites were highlighted by yellow colors.
NA	341	GA	TGC
Artifact	37092	GA	TGG
polyA tail	52234	CT
polyA tail	63163	CT
A few	65716	CT	CCT	CTT
NA	66445	GA
polyA tail	76747	GA
NA	90984	GA
NA	94379	CT
NA	113687	GA	AAAAGAAGAAAAAAA	AAAAAAAGAAAAAAA	intergenic
NA	113690	GA	AAAAGAAGAAAAAAA	AAAAGAAAAAAAAAA	intergenic
polyA tail	115646	CT
NA	147665	CT	NA
Note: 13 of the 50 editing sites identified in the previous study were not detected or identified as SNPs of other types.
